# Supplementary material
Source: PubMed Central journal article supplement (PMC3582790)
Supplement: NIHMS440373-supplement-216_2013_6712_MOESM1_ESM.pdf [file NIHMS440373-supplement-216_2013_6712_MOESM1_ESM.pdf]

## Quantitative, solution-phase profiling of multiple transcription factors in parallel

Betul Bilgin, Li Liu, Christina Chan and S. Patrick Walton

**Fig. S1.** Binding buffer pH Analysis. Both specific and nonspecific binding were quantified at different pH values. pH 6.5 was selected, because it was closest to physiological pH while maintaining reasonable total specific signal and acceptable specific/non-specific ratio. Y-axis is cpm by scintillation counting of radiolabeled DNA probes recovered from the beads following binding to their specific (blue) or nonspecific (red) protein target, separation, and elution.

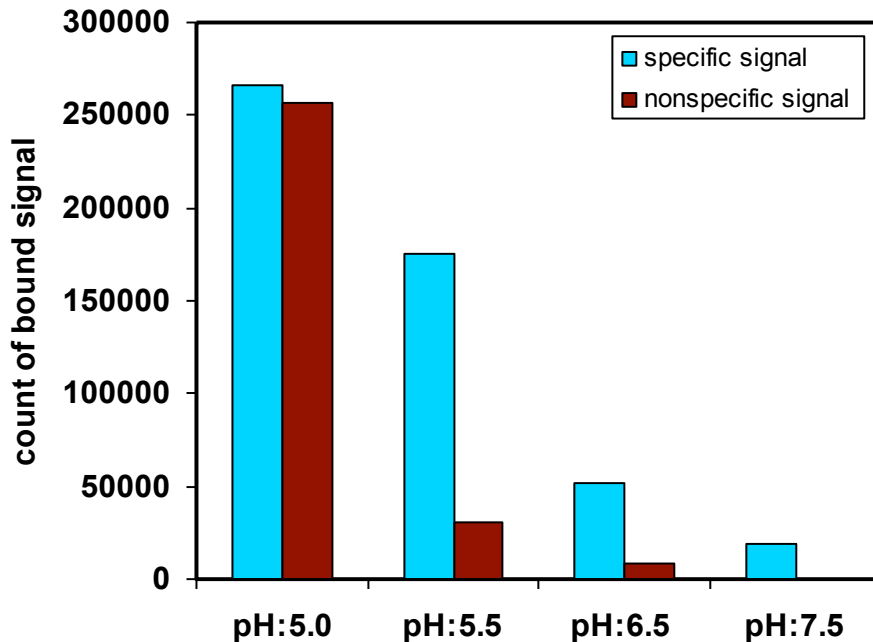

**Fig. S2.** The amount of protein immobilized on the beads was analyzed using a Bradford assay (to detect all proteins) and Western blot (with biotin antibody to detect biotinylated proteins). The Bradford results confirm that more than 83% of proteins from the nuclear extracts were retained by the beads during immobilization. This suggests that all or nearly all of the proteins in the original extract were biotinylated. This was further supported by the Western blots showing that essentially all of the biotinylated protein in the sample was retained on the beads during the immobilization process.

**Bradford results**

|              | Before immobilization | After immobilization | percent immobilized |
|--------------|-----------------------|----------------------|---------------------|
| TNF $\alpha$ | 0.494                 | 0.013                | 97.3                |
| Ctrl         | 0.467                 | 0.053                | 88.5                |
| IKK inh.     | 0.514                 | 0.083                | 83.8                |

**Western results**

**Pure Protein Immobilization      Nuclear Extract Immobilization**

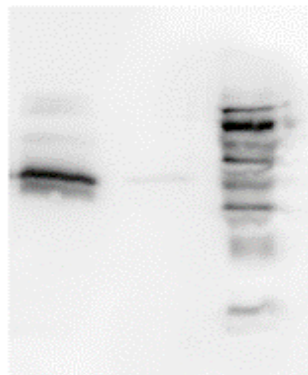

Before →  
Immobilization  
After →  
Immobilization  
Biotin Marker →

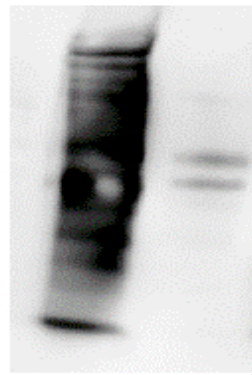

Before →  
Immobilization  
After →  
Immobilization

**Fig. S3.** Binding analysis of biotinylated protein. The binding of the DNA probe to biotin labeled NF-κB and un-labeled NF-κB was analyzed by EMSA. As shown in the gel, the binding properties were not altered by biotinylation.

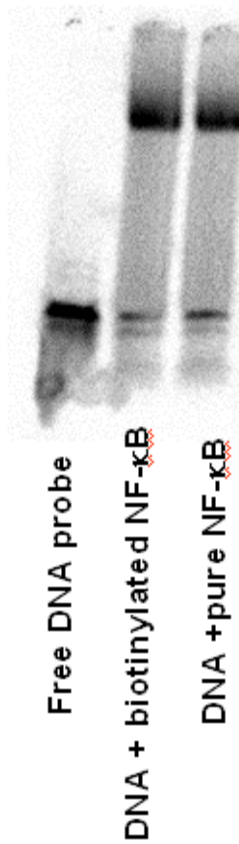

**Table S1.** An example of the cpm measured for each step of pure protein detection. In this case, 3 nM NF-κB was used.

| Before             | After              | Wash1              | Wash2 | Wash3 | Elution            |
|--------------------|--------------------|--------------------|-------|-------|--------------------|
| $1.68 \times 10^5$ | $1.33 \times 10^5$ | $1.43 \times 10^3$ | 554   | 250   | $3.24 \times 10^4$ |

**Table S2.** Sequences of DNA probes and PCR primers. TF binding consensus sequences are in bold. Complementary sequences of primers to DNA probes are underlined.

| Transcription Factor | Probe name           | Probe sequence                            |
|----------------------|----------------------|-------------------------------------------|
| NF-kB                | NF-kB oligo          | 5'-AGTTGAGGGG <b>ACTTTCC</b> CAGGA-3'     |
|                      | NF-kB complement     | 5'-TCCTGGGAAAGTCCCCTCAACT-3'              |
| Ap1                  | Ap1 oligo            | 5'-CGCTTGATGAG <b>TCAGCC</b> GGA-3'       |
|                      | Ap1 complement       | 5'-TCCGGCTGACTCATCAAGCG-3'                |
| TBP                  | TBP oligo            | 5'-CGCCTACCTCATT <b>TTATAT</b> GCTCTGC-3' |
|                      | TBP complement       | 5'-GCAGAGCATATAAAATGAGGTAGGCG-3'          |
| Negative control     | NC oligo             | 5'-TATTTAGGAGGAGTTCACCACATAG-3'           |
|                      | NC complement        | 5'-CTATGTGGTGAACCTCCTAAATA-3'             |
| NF-kB primer         | NF-kB forward primer | 5'-GTTTCTTCGACTTCGCGGCCTCCTGGGAAAG -3'    |
|                      | NF-kB reverse primer | 5'-GTTTCTTCCTGCGGCGACCGAGTTGAGGGGA -3'    |
| Ap1 primer           | Ap1 forward primer   | 5'- GCTGCCTGCCCGCTTGATGA-3'               |
|                      | Ap1 reverse primer   | 5'- CTGCACGTCGTCCGGCTGAC-3'               |

### Analysis of Transcription Factor:DNA binding

For single site DNA (D) binding to a transcription factor (T), the binding reaction can be written as;

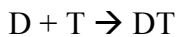

where:

$$K_D = \frac{[D]*[T]}{[DT]}$$

[D], [T] and [DT] represent the concentration of DNA, transcription factor and DNA:transcription factor complex at equilibrium, respectively.

Using  $[D]_0$  and  $[T]_0$  for the initial concentrations of DNA and transcription factor, respectively, the equation becomes:

$$K_D = \frac{([D]_0 - [DT]) * ([T]_0 - [DT])}{[DT]}$$

At  $[D]_0 \gg [T]_0$ , the equation can be simplified to:

$$K_D = \frac{[D]_0 * ([T]_0 - [DT])}{[DT]}$$

Then:

$$\frac{[DT]}{[T]_0} = f = \frac{[D]_0}{K_D + [D]_0}$$

If  $[D]_0 \gg K_D$ , then  $[DT] = [T]_0$ , meaning that all the transcription factor in the sample is bound to DNA. This condition gives maximal sensitivity. However, separation of complexes from the free DNA needs to be perfect, given the huge excess of free DNA relative to TF.

On the other hand, if protein is in excess ( $[T]_0 \gg [D]_0$ ), the equation can be simplified to:

$$K_D = \frac{([D]_0 - [DT]) * [T]_0}{[DT]}$$

Then:

$$\frac{[DT]}{[D]_0} = f = \frac{[T]_0}{K_D + [T]_0}$$

While limited in sensitivity by the relative magnitude of  $[T]_0$  and  $K_D$ , this case allows more straightforward separation as the labeled molecule, the DNA, is limiting.
